1 **Age-dependent impairment of disease tolerance is associated with a robust**  
2 **transcriptional response following RNA virus infection in *Drosophila***

3

4 Lakbira Sheffield<sup>1#</sup>, Noah Sciambra<sup>1</sup>, Alysa Evans<sup>1</sup>, Eli Hagedorn<sup>1</sup>, Megan Delfeld<sup>1</sup>, Casey  
5 Goltz<sup>1</sup>, Janna L. Fierst<sup>1</sup> and Stanislava Chtarbanova<sup>1\*</sup>

6

7 <sup>1</sup> Department of Biological Sciences, University of Alabama

8 300, Hackberry lane, Tuscaloosa, AL-35487, USA

9 # Present address: Graduate Biomedical Sciences program, University of Alabama at

10 Birmingham

11 \* Corresponding author: Stanislava Chtarbanova

12 300, Hackberry lane

13 Tuscaloosa, AL-35487

14 USA

15 Phone: +1 205 348 0559

16 Fax: +1 205 348 1786

17 Email: [schtarbanova@ua.edu](mailto:schtarbanova@ua.edu)

18

19 **Running title:** Antiviral immunity in aged *Drosophila*

20 **Keywords:** aging, infection, tolerance, RNA virus, *Drosophila melanogaster*, transcriptomics

21

## 22 **Summary**

23 Advanced age in humans is associated with greater susceptibility to and higher mortality rates  
24 from infections, including infections with some RNA viruses. The underlying innate immune  
25 mechanisms, which represent the first line of defense against pathogens, remain incompletely  
26 understood. *Drosophila melanogaster* is able to mount potent and evolutionarily conserved  
27 innate immune defenses against a variety of microorganisms including viruses and serves as  
28 an excellent model organism for studying host-pathogen interactions. With its relatively short  
29 lifespan, *Drosophila* also is an organism of choice for aging studies. Despite numerous  
30 advantages that this model offers, *Drosophila* has not been used to its potential to investigate  
31 the response of the aged host to viral infection. Here we show that in comparison to younger  
32 flies, aged *Drosophila* succumb more rapidly to infection with the RNA-containing Flock House  
33 Virus (FHV) due to an age-dependent defect in disease tolerance. In comparison to younger  
34 individuals, we find that older *Drosophila* mount larger transcriptional responses characterized  
35 by differential regulation of more genes and genes regulated to a greater extent. Our results  
36 indicate that loss of disease tolerance to FHV with age possibly results from a stronger  
37 regulation of genes involved in apoptosis, activation of the *Drosophila* Immune deficiency  
38 (IMD) NF- $\kappa$ B pathway or from downregulation of genes whose products function in  
39 mitochondria and mitochondrial respiration. Our work shows that *Drosophila* can serve as a  
40 model to investigate host-virus interactions during aging and sets the stage for future analysis  
41 of the age-dependent mechanisms that govern survival and control of virus infections at older  
42 age.

43

44

## 45 **Introduction**

46 Infectious diseases, including viral infections, represent an important burden among the  
47 elderly. For instance, older age is a major risk factor for increased morbidity and mortality to  
48 numerous viral pathogens including the Severe acute respiratory syndrome (SARS) associated  
49 coronavirus-2 (SARS-CoV-2), the agent responsible for the current COVID-19 pandemic  
50 (NIKOLICH-ZUGICH *et al.* 2020). Immunosenescence, a collective term used to describe the  
51 progressive functional decline of the immune system over time, is associated with the  
52 increased susceptibility to infections and lower responsiveness to vaccination observed in the  
53 elderly (LENG AND GOLDSTEIN 2010). Considerable progress has been made in understanding  
54 how aging affects both, the innate and adaptive immune systems, however, the causes  
55 underlying immunosenescence remain incompletely elucidated. In particular, the age-  
56 dependent mechanisms leading to dysregulated innate immunity, which represents the first  
57 line of defense against invading pathogens, are less well documented (reviewed in (NIKOLICH-  
58 ZUGICH 2018)). Moreover, the exact factors and molecular events contributing to the more  
59 rapid death of the aged organism following virus infection are not fully understood (NIKOLICH-  
60 ZUGICH *et al.* 2020). With an increasing aging population (HE *et al.* 2016), there is a great need  
61 to further our knowledge of the mechanisms underlying the capability of the aged organism to  
62 survive infection to ensure appropriate preventive and treatment strategies and to improve  
63 healthspan.

64 Pioneering research using the genetically tractable model organism *Drosophila melanogaster*,  
65 which in contrast to vertebrates is devoid of a classic adaptive immune system, has uncovered  
66 conserved mechanisms of activation of innate immunity in response to bacterial and fungal  
67 pathogens. Following bacterial or fungal infection, two nuclear factor kappa B (NF- $\kappa$ B)

68 pathways, Toll and immune deficiency (IMD), which share similarities with mammalian Toll-like  
69 receptor/interleukin (IL)-1 receptor and tumor necrosis factor receptor (TNFR) pathways,  
70 respectively, are activated and mediate the transcription of downstream targets including  
71 antimicrobial peptides (AMPs) (reviewed in (LEMAITRE AND HOFFMANN 2007)). *Drosophila* also  
72 detect and respond to viral pathogens via multiple mechanisms that mediate antiviral  
73 defenses. RNA interference (RNAi), which relies on production of virus-derived small  
74 interfering RNAs (siRNAs), provides broad protection against RNA and DNA viruses. Cellular  
75 processes such as apoptosis, apoptotic bodies' clearance by plasmatocytes (macrophage-like  
76 cells in *Drosophila*) and autophagy also represent effective antiviral mechanisms (reviewed in  
77 (MUSSABEKOVA *et al.* 2017) and in (LAMIABLE AND IMLER 2014)). In *Drosophila*, viral infections  
78 are also associated with complex transcriptional responses that reflect the regulation of cellular  
79 pathways, production of cytokines and effector molecules, changes in stress response and  
80 physiology (reviewed in (MUSSABEKOVA *et al.* 2017)). Although the *Drosophila* genome does  
81 not encode for interferon genes, the protein encoded by the stimulator of interferon genes  
82 (STING), which in mammals activates NF- $\kappa$ B and interferon signaling in response to viral  
83 infection, is present in this organism. dSTING recently was shown to contribute to antiviral  
84 immunity by interacting with some of the components of the *Drosophila* IMD pathway in  
85 response to picorna-like viruses (GOTO *et al.* 2018) and by activating downstream autophagy in  
86 response to ZIKA virus infection in the brain (LIU *et al.* 2018). In addition to these mechanisms  
87 that are in control of pathogen burden (also referred as resistance mechanisms), the outcome  
88 of infection is determined by the ability of the host or to endure the damaging effects caused by  
89 the pathogen or resulting from immunopathology (a phenomenon known as disease  
90 tolerance). Both resistance and tolerance are considered components of host immunity and

91 effective tolerance mechanisms allow resistance mechanisms to operate in a more optimal  
92 way (MARTINS *et al.* 2019).

93         Aging in *Drosophila* also leads to deregulation of innate immunity. For instance,  
94 expression of several genes encoding AMPs downstream of NF- $\kappa$ B pathways increases with  
95 age (reviewed in (GARSCHALL AND FLATT 2018)), similar to inflammaging, the low grade chronic  
96 inflammation that accompanies aging (FRANCESCHI *et al.* 2000) in mammals. Additionally, the  
97 phagocytic capacity of *Drosophila* macrophages declines with age (MACKENZIE *et al.* 2011;  
98 HORN *et al.* 2014). Aged *Drosophila* also are more sensitive to infections with Gram-negative  
99 bacteria, Gram-positive bacteria, fungi and viruses such as *Drosophila* C virus (DCV) and the  
100 Flock House virus (FHV) (RAMSDEN *et al.* 2008; ELEFThERIANOS *et al.* 2011; FABIAN *et al.* 2018).  
101 However, there is still a very limited understanding of how antiviral immunity operates as a  
102 function of age in *Drosophila*. With increasing evidence for impaired defenses against viruses  
103 in the aged organism, flies can serve as a prime genetic model of aged host-virus interactions  
104 and can offer unique opportunities for mechanistic dissection of age-dependent innate immune  
105 responses.

106         In the present study, we conducted comparative analysis of survival, virus load and  
107 gene expression between young and aged *Drosophila* following infection with the Flock House  
108 Virus (FHV). FHV is a small, non-enveloped virus, whose genome is composed of two positive,  
109 single-stranded RNA molecules (VENTER AND SCHNEEMANN 2008). We report that older flies  
110 succumb faster to FHV infection without accumulating higher virus loads, suggesting that a  
111 tolerance mechanism becomes impaired with age. Additionally, we show that aged flies mount  
112 a more robust transcriptional response to FHV than young flies, including the regulation of  
113 innate immunity genes; response, which is different from the response of flies undergoing

114 aging. Genes encoding components of the apoptotic process are predominantly regulated in  
115 aged, FHV-infected flies. Additionally, we show that several genes whose gene products  
116 function in mitochondria and mitochondrial respiratory chain are specifically downregulated in  
117 aged, FHV-infected flies. We also demonstrate that among genes that do not belong to specific  
118 gene ontology categories, the expression of several encoding for non-coding RNAs (ncRNAs)  
119 changes in aged, FHV-infected flies in comparison to young, FHV-infected *Drosophila* and flies  
120 undergoing aging. Collectively, our work shows that virus infection in aged flies triggers  
121 profound changes in transcriptomics and establishes *Drosophila* as a model that allows  
122 investigation of the age-dependent mechanisms underlying the response and survival to viral  
123 infection.

124

125 **Results**

126 **FHV infection leads to decreased survival but not increased virus load in aged**

127 ***Drosophila***

128 To determine how age affects survival to infection with FHV, we injected 5-day old and 30-day  
129 old wild type (*OregonR*) male or female flies with either Tris buffer (control) or FHV and  
130 recorded their survival every 24 hours. 30-day old flies (median survival =  $6.75 \pm 0.17$  days for  
131 males and  $7.17 \pm 0.28$  days for females) showed decreased survival in comparison to 5-day old  
132 flies (median survival =  $8.17 \pm 0.15$  days for males and  $8.04 \pm 0.23$  days for females) (Figure 1A  
133 and Figure S1A). We hypothesized that the higher mortality in aged flies could result from  
134 increase in FHV load. To test this, we separately injected groups of male and female 5- and  
135 30-day old flies with either Tris or FHV and measured virus load 96h post infection (p.i.) using  
136 quantitative reverse transcription PCR (RT-qPCR). For both sexes we observed comparable,  
137 non-significantly different levels of FHV RNA1 (*FHV1*) expression between young and aged  
138 flies (Figure 1B). Interestingly, although survival curves overlapped at 5 days of age between  
139 both sexes (Figure 1A and Figure S1A), virus load was significantly lower in females in  
140 comparison to males (Figure 1B). At 30 days of age, females showed significant, two-fold  
141 decrease in virus load in comparison to males (Figure 1B), which was accompanied with  
142 slightly better, although non-significantly different median survival to FHV ( $6.75 \pm 0.17$  days for  
143 males and  $7.17 \pm 0.28$  days for females, Figure S1A). In support of the data obtained for  
144 *OregonR* male flies, similar differences in survival between 5- and 30-day old flies, and  
145 comparable *FHV1* load at 72h p.i. between animals of the two age groups was observed for

146 males of another genotype, *y1 W67c23* (Figure S1B). Additionally, we found non-significant  
147 differences between FHV titers in circulating hemolymph (insect blood) of 5- and 30-day old  
148 female *w<sup>1118</sup>* flies 96h p.i. (Figure S1C).

149         Altogether, these results indicate that 30-day old *OregonR* flies succumb faster to  
150 infection with FHV than younger flies, where males exhibit higher mortality in comparison to  
151 females. Moreover, decreased survival of infected 30-day old flies is not accompanied with  
152 increased FHV titers in whole flies, suggesting that the aged organism is able to control viral  
153 pathogen burden.

154

### 155 **Aged *Drosophila* mount a robust transcriptional response following FHV infection**

156 Both aging and virus infection lead to changes in the *Drosophila* transcriptome (PLETCHER *et al.*  
157 2002; KEMP *et al.* 2013; CHTARBANOVA *et al.* 2014). We hypothesized that aged flies infected  
158 with FHV mount a distinct transcriptional response in comparison to young flies, potentially  
159 accounting for the observed increase in mortality. To test this, we performed transcriptomics  
160 analysis using RNA sequencing (RNA-Seq) on 7-day old (young) and 25-day old (aged) male  
161 *OregonR Drosophila* injected with either Tris or FHV at 24h and 48h following injection. This  
162 sex was chosen because aged males showed more pronounced effect on survival than  
163 females. The time points were chosen early in the infection process before differences in  
164 survival between age groups were detected. As an additional control, we used non-infected  
165 young and aged flies to control for the effects of aging alone in absence of infection. An  
166 average of 95.4% of each RNA-Seq library (Table S1) aligned to the *D. melanogaster* genome  
167 (Table S2). We validated the RNA-Seq data for aging and the 48h post FHV infection time  
168 point using specific primers and RT-qPCR analysis for four genes per experimental condition.



169 We confirmed that in aging flies *Cpr67Fb* and *CG15199* were upregulated and *Acp54A1* and  
170 *Lman III* were downregulated. In young *Drosophila*, 48h after FHV infection, *Upd2* and *Ets21c*  
171 were upregulated and *Rfabg* and *Diedel 3* were downregulated in comparison to Tris-injected  
172 controls. In aged flies, FHV infection led to upregulation of *Or85a* and *Upd3* and  
173 downregulation of *IM14* and *GGBP-Like 3* (Figure S2).

174 To evaluate the overall similarity and differences between treatments, we used principal  
175 component analysis (PCA). PCA creates new orthogonal variables that maximize the variance  
176 observed in high dimensional space, in this case the expression levels across annotated *D.*  
177 *melanogaster* genes. Principal component 1 (PC1) explains the majority of variance across  
178 samples and treatments while subsequent PCs explaining the next most uncorrelated  
179 variance. We observed that both young and aged FHV samples displayed a composite  
180 signature of gene regulation fundamentally different from non-infected young, non-infected  
181 aged or Tris-injected samples (Figure 2A). PC1 explained 54% of the variance in gene  
182 expression and separated young and older FHV-infected hosts from non-infected controls.  
183 PC2 explained 20% of the variance in expression and further separated FHV-infected hosts  
184 24h and 48h p.i. Each of the three replicates grouped by treatment with the exception of the  
185 young Tris-injected flies 24h and 48h post-injection, which overlapped.

186 Differential gene expression analysis following FHV infection revealed that more genes  
187 were significantly regulated ( $p_{adj} < 0.05$ ) at least two-fold at 48h p.i. in comparison to 24h p.i.  
188 in both age groups. More genes were differentially changed in aged FHV-infected flies in  
189 comparison to young flies for both time points (Figure 2B, Table S3). Overall, in young flies,  
190 the expression of 505 genes was differentially regulated 24h p.i. vs 1,168 genes 48h p.i. In  
191 aged flies, we observed differential regulation of 816 genes at 24h p.i. and 2,625 genes at 48h

192 p.i. The process of aging itself differentially regulated expression of 1,639 genes (Figure 2B).  
193 We note that in aging flies, more genes are downregulated than upregulated, whereas in aged,  
194 FHV-infected flies there are fewer downregulated than upregulated genes (Figure 2B).

195       Among the genes differentially regulated during aging, we observed a very small  
196 overlap with genes regulated by infection at either young or older age, 24h or 48h p.i. (1.4%  
197 and 2.5%, respectively) (Figure 2C). At 24h p.i., ~50% of upregulated genes and 57% of  
198 downregulated genes in young flies overlapped with genes upregulated in aged, FHV-infected  
199 flies. At 48h p.i. in young flies, 93% of upregulated genes overlapped with upregulated genes  
200 in FHV-infected aged flies and 57% of downregulated genes overlapped between the two age  
201 groups (Figure 2C).

202       Altogether, these results indicate that aged male flies mount a larger transcriptional  
203 response following FHV infection than younger flies, a signature that is different from the  
204 transcriptional changes taking place during the aging process itself. The fact that most of  
205 commonly regulated genes between young and aged FHV-infected flies were found to overlap  
206 as a function of time (86% of up- and 87% of down-regulated genes, Figure S3), is in support  
207 of the hypothesis that the age-dependent defect in disease tolerance is unlikely to result from  
208 the regulation of these genes. Rather, our data suggest that impaired tolerance in aged flies  
209 could be due to differential regulation of the genes that are uniquely expressed in infected  
210 young flies, uniquely expressed in infected aged flies or a combination of both.

211

212 **FHV infection triggers transcriptional changes in similar and different biological**  
213 **processes in young and aged *Drosophila***

214 To visualize biological processes regulated by aging and FHV infection in young and aged  
215 flies, we performed gene ontology (GO) analysis. The number of genes with Flybase ID (FBgn  
216 number) without a matching DAVID ID is listed in Table S4. We note that most differentially  
217 regulated genes with a DAVID ID were labeled as “Others” (Figure S4). For instance, 76% of  
218 differentially regulated genes for the Aging group did not match a specific biological process.  
219 For Young FHV24h, Young FHV48h, Aged FHV24h and Aged FHV48h, these percentages are  
220 53%, 59%, 60% and 59%, respectively (Figure S4).

221 Our GO analysis revealed a complex signature. For instance, aging led to changes in  
222 expression of genes belonging to 57 biological processes. Five of them (‘defense response’,  
223 ‘response to bacterium’, ‘antibacterial humoral response’, ‘defense response to Gram-positive  
224 bacterium’ and ‘oxidation-reduction’) overlapped between all five experimental conditions.  
225 ‘Mannose metabolic process’ and ‘protein refolding’ were in common between Aging and Aged  
226 FHV24h groups and ‘sperm storage’ between Aging and Aged FHV48h groups. Processes  
227 identified in common between the Aging group and young and aged FHV-infected flies were  
228 ‘circadian rhythm’, ‘multicellular organism reproduction’ and ‘proteolysis’ (Figure 3 and Table  
229 S5). In *Drosophila*, aging leads to both, deregulation of organismal reproduction (TATAR 2010)  
230 and innate immunity (PLETCHER *et al.* 2002; ZEROFSKY *et al.* 2005; KOUNATIDIS *et al.* 2017). In  
231 flies, it is also well established that physiological trade-offs exist between immune activation  
232 and reproductive capacity (ZEROFSKY *et al.* 2005), potentially accounting for the differential  
233 regulation of genes involved in organismal reproduction after FHV infection in both, young and  
234 aged flies. Among the 46 biological processes specific to Aging, we find genes belonging to  
235 ‘metabolic process’ and ‘spermatogenesis’ GO categories (Figure 3). This aligns with previous  
236 studies showing that aging impacts male germline stem cells and leads to decrease in

237 spermatogenesis (BOYLE *et al.* 2007) as well as with previous observations that the aging  
238 process leads to differential regulation of genes involved in *Drosophila* metabolism (PLETCHER  
239 *et al.* 2002).

240 At 24h p.i., we identified more biological processes in young flies than in aged animals  
241 (96 vs 80, respectively), among which five overlapped between the two age groups. 70 and 26  
242 biological processes were specific to Young FHV24h and Aged FHV24h, respectively (Figure 3  
243 and Table S5). At 48h p.i., we found an opposite trend with 81 and 135 biological processes in  
244 young and aged flies, respectively, among which 23 overlapped. We found 20 and 63  
245 biological processes to be specific to the Young FHV48h and Aged FHV48h groups,  
246 respectively (Figure 3 and Table S5).

247 In both young and aged flies, FHV infection led to differential regulation of genes  
248 involved in processes associated with the nervous system. Clustering analysis identified one  
249 module of 'neurogenesis' genes that were strongly upregulated in the Aged FHV48h group and  
250 regulated to a lesser extent in Young FHV48h and Aged FHV24h groups (Figure S5A). For  
251 instance, among genes belonging to this GO category at 48h p.i., the gene *midlife crisis*  
252 (*mdlc*), which is required for neuroblast proliferation and neuronal differentiation in *Drosophila*  
253 (CARNEY *et al.* 2013), was upregulated to a greater extent in aged flies. *Ankyrin repeat and*  
254 *LEM domain containing 2 (Ankle2)*, the *Drosophila* ortholog of human ANKLE2, which is a  
255 target of the ZIKA virus NS4 protein (SHAH *et al.* 2018), also showed stronger upregulation in  
256 aged flies (Figure S5B and Table S3). Other biological processes linked to the nervous system  
257 development and function for which genes were enriched in young and aged FHV-infected  
258 groups were 'lateral inhibition', 'sleep' and 'ventral cord development' (Table S5). The  
259 significance of this regulation is not known as FHV has not been previously demonstrated to

260 target the nervous system, but rather the *Drosophila* heart and fat body (ELEFThERIANOS *et al.*  
261 2011). Among other common processes identified we find ‘innate immune response, ‘protein  
262 folding’, ‘rRNA processing’ and ‘response to heat’. In *Drosophila*, the heat shock response  
263 plays an antiviral role against the RNA viruses DCV and Cricket Paralysis Virus (CrPV), as well  
264 as against the DNA Invertebrate Iridescent Virus 6 (IIV-6) (MERKLING *et al.* 2015). Indeed,  
265 several heat shock proteins belonging to the biological process ‘response to heat’ were  
266 upregulated in both young and aged FHV-infected flies (Table S3 and Table S5). This  
267 suggests that following FHV infection, this branch of antiviral immunity is functional in aged  
268 flies.

269 Interestingly, genes belonging to additional categories associated with nervous system’s  
270 function such as ‘neuromuscular synaptic transmission’, ‘transmembrane transport’ and  
271 ‘neurotransmitter secretion’ were specifically found in the Young FHV24h group. On the other  
272 hand, among processes specific to Aged FHV24h we found ‘autophagic cell death’, and  
273 ‘regulation of autophagy’ (Table S5). Among processes specifically enriched 48h p.i., we found  
274 ‘regulation of transcription, DNA-templated’, ‘transmembrane receptor protein tyrosine kinase  
275 signaling pathway’ and “protein ubiquitination” in young flies and ‘phagocytosis’, ‘programmed  
276 cell death’ and ‘peptidoglycan recognition protein signaling pathway’ in aged flies. The latter  
277 category contained multiple genes encoding for components of the *Drosophila* IMD pathway.  
278 Finally, among the processes specifically regulated in aged flies at both 24h and 48h p.i., we  
279 found ‘apoptotic process’, ‘determination of adult lifespan’ and ‘chromatin remodeling’ (Table  
280 S5).

281 Overall, these results indicate that despite a large number of “other” genes, genes  
282 belonging to identifiable common and distinct categories of biological processes are regulated

283 by aging and FHV infection of young and aged flies. Although our results identify specific  
284 categories of biological processes for each experimental group (Figure 3), at this stage we are  
285 not able to determine whether the age-associated impairment of tolerance depends on the  
286 regulation of genes that are specifically regulated in young or/and aged flies.

287

288 **Profiles of innate immunity gene expression are distinct between aging and FHV**  
289 **infection in young and aged flies**

290 We found genes belonging to ‘innate immune response’ to be differentially regulated in both  
291 young and aged FHV-infected flies at 24h and 48h p.i. Clustering analysis for this GO category  
292 identified similar patterns of differential gene expression between young and aged, FHV-  
293 infected flies. However, this regulation was to a greater extent in aged, FHV-infected flies  
294 (Figure 4A). The expression pattern of immunity-related genes during aging, for most part, was  
295 opposite than following FHV infection. Consistent with previous reports, we observed  
296 increased expression of several AMP and Immune induced molecule (IM) genes (*CecA1*, *Def*,  
297 *IM3*, *Drs*, *IM2*, *IM1*, *IM4*, *IM14* and *IM33*) as well as *GNBP-like 3* in aging flies (Figure 4A,  
298 Figure S6 and Table S3). Interestingly, in both young and aged flies, FHV infection led to  
299 strong downregulation of most AMP and IM genes, despite a robust upregulation of the mRNA  
300 encoding the NF- $\kappa$ B factor Relish (Figure 4A and Table S3). In aged FHV-infected flies, we  
301 observed marked upregulation of IMD pathway components *PGRP-LE*, *imd*, *key* (*IKK $\gamma$* ) and  
302 *AttD*. This upregulation was to a greater extent in the Aged FHV48h group (Figure 4A and  
303 Figure S6). In comparison to aging and young FHV-infected *Drosophila*, we found *dSTING*,  
304 whose product acts upstream of Relish to protect flies against infection with DCV and CrPV  
305 (GOTO *et al.* 2018), to be strongly upregulated in aged FHV-infected flies (Figure S6). In

306 comparison with non-infected flies, Tris injection alone affected to a greater extent the  
307 expression in aged flies of several *Turandot* (*Tot*), IM and AMP genes at the 24h time point  
308 (Figure 4A). This suggests that older animals respond to injury by upregulating innate immunity  
309 genes to a greater extent than younger flies.

310 Altogether, these results indicate that aging and virus infection lead, for the most part, to  
311 different transcriptional signatures for innate immunity genes. Additionally, aged flies carry out  
312 an overall stronger response to FHV than younger flies and regulate expression of more  
313 components of the IMD pathway. Because overactivation of the IMD pathway exerts  
314 detrimental effects on *Drosophila* tissues and leads to premature death (CAO *et al.* 2013;  
315 KOUNATIDIS *et al.* 2017), our results also suggest that the specific upregulation of components  
316 of this pathway could be responsible for impaired tolerance and decreased survival in aged  
317 FHV-infected flies.

318

### 319 **Strong apoptotic gene expression signature in aged *Drosophila* following FHV infection**

320 “Apoptotic process” was among the GO categories represented specifically in aged FHV-  
321 infected flies (Figure 3 and Table S5). Apoptosis is a form of programmed cell death and p53-  
322 dependent early induction of pro-apoptotic genes has been proposed to play a protective role  
323 against FHV infection in *Drosophila* (LIU *et al.* 2013). Additionally, infection with FHV of  
324 *Drosophila* cells in culture leads to induction of apoptosis, which is dependent on the effector  
325 caspase DrICE, the initiator caspase Dronc and its cofactor Dark (SETTLES AND FRIESEN 2008).  
326 Consistent with this, we find that FHV infection in young and predominantly in aged flies leads  
327 to transcriptional changes in expression of several genes involved in the apoptotic process  
328 (*p53*, *Dronc* and *Dark*) 48h after FHV infection (Figure 4B). In cell culture, over the course of

329 FHV infection, protein levels of the *Drosophila* inhibitor of apoptosis (Diap-1) are progressively  
330 depleted as a possible result of host cell translational shut down (SETTLES AND FRIESEN 2008).  
331 In our RNA-Seq data we find that *diap-1* mRNA increased post infection and to higher levels in  
332 aged flies in comparison to young adults (Figure 4B). This change could potentially represent a  
333 compensatory increase in *diap-1* mRNA as a result of the rapid depletion of the protein. Aged,  
334 FHV-infected flies also exhibited increased expression of additional genes belonging to this  
335 GO category (Figure 4B).

336 Collectively, these results are in agreement with previous findings that FHV infection  
337 leads to apoptotic cell death and suggest that either more rapid or widespread activation of cell  
338 death takes place in the aged, FHV infected organism.

339

340 **Genes specifically downregulated in aged flies following FHV infection are enriched for**  
341 **metabolism and mitochondria**

342 We performed pathway enrichment analysis on the genes specifically regulated in the Aged  
343 FHV48h group (822 upregulated and 778 downregulated genes, respectively; Figure 2C) using  
344 the Kyoto Encyclopedia of Genes and Genomes (KEGG) database. We identified 'purine  
345 metabolism', 'pyrimidine metabolism' and 'RNA polymerase' for upregulated genes, likely  
346 reflecting the higher transcriptional rates observed in aged animals in comparison with younger  
347 adults following FHV infection. Among downregulated genes we found 'metabolism' as a  
348 strongly enriched category (Figure S7). Using cellular component GO analysis, we found  
349 among downregulated genes several belonging to mitochondria and to mitochondrial electron  
350 transport chain (ETC) complexes I, III and IV (Figure 5). Mitochondrial ETC complexes  
351 represent a series of four protein complexes (I-IV) distributed along the inner mitochondrial



352 membrane, where they function to pump protons from the mitochondrial matrix into the  
353 intermembrane space. ETC complexes are coupled to Complex V (the ATP synthase), which  
354 helps the production of ATP (BURKE 2017). The observed downregulation of these genes could  
355 reflect a virus induced defect of the mitochondrial respiratory chain affecting ATP levels,  
356 specifically in the infected aged organism.

357

### 358 **Non-coding RNAs are differentially regulated by aging and FHV infection**

359 We took a closer look at the differentially regulated genes, which were labeled as ‘other’ in our  
360 GO analysis (Figure S4). We observed that most of these genes are uncharacterized  
361 (categorized as candidate genes, or CG); several are non-coding RNAs (ncRNA); and others  
362 have previously described function but do not fit a specific DAVID GO category. Among  
363 ncRNAs, long non-coding RNAs (lncRNAs) correspond to a class of transcripts, which are at  
364 least 200nt long and lack a significant open reading frame (reviewed in (SUN AND KRAUS  
365 2015)). Most lncRNAs are polyadenylated and can be reliably identified in our RNA-Seq  
366 workflow, in which an oligo-dT- based enrichment of poly-A-containing transcripts was used. A  
367 class of lncRNAs corresponds to antisense (as) RNAs, which are natural antisense transcripts  
368 (NATs) that overlap with protein-coding *loci* in the antisense direction.

369 We compared the number of ncRNAs differentially regulated at least two-fold in our  
370 RNA-Seq dataset and observed changes in expression of higher number of ncRNAs genes in  
371 aged FHV-infected than in young FHV-infected flies (68 vs 42 genes 24h p.i. and 267 vs 111  
372 genes 48h p.i.) (Figure 6A, B and Figure S8A). Aging itself regulated the expression of 202  
373 ncRNA genes. As observed for the total number of transcripts, ncRNAs, which were regulated  
374 by infection shared minimal overlap with aging (Figure 6B and Figure S8A). Among ncRNAs,

375 we identified the largest proportion to correspond to lncRNAs. For all experimental groups we  
376 also found asRNAs and small nucleolar RNAs (snoRNAs). In young FHV-infected flies, a small  
377 percentage of ncRNAs corresponded to stable intronic sequence RNAs (sisRNAs).  
378 Specifically, in aged, FHV-infected flies we found differential regulation of ncRNAs that belong  
379 to small nuclear (snRNAs) and small non-messenger RNAs (snmRNAs) (Figure S8B).

380 We compared the expression of *CR45445* (an asRNA) and *CR46083* (an lncRNA)  
381 genes 48h p.i. by RT-qPCR. Consistent with the RNA-Seq data, we observed significant  
382 increase in *CR45445* and significant decrease in *CR46038* expression in comparison to Tris-  
383 injected controls in aged, but not young flies (Figure 6C). Together, these results indicate that  
384 both, aging and FHV infection affect the expression of genes encoding different categories of  
385 ncRNAs, and that specific ncRNAs are regulated in the aged organism after FHV infection.

## 386 **Discussion**

387 We used the highly tractable genetic model *Drosophila melanogaster* to investigate the  
388 response of the aged organism following infection with the RNA(+) virus FHV. We found that  
389 30-day old flies died faster than younger flies to FHV infection and that older, but not younger  
390 males were more sensitive than females. Although for both sexes we did not observe a  
391 difference in virus load as a function of age, our results indicate higher FHV titers in younger  
392 males in comparison to younger females, for which survival curves overlap. Although we  
393 cannot exclude genetic background-specific effects, our results raise the interesting question  
394 of whether control of virus replication in the young organism represents a sexually dimorphic  
395 trait. We observed that older males die faster than older females and contain twice the level of  
396 *FHV RNA1* transcript than females. This could potentially indicate that in comparison to  
397 females, younger males are able to tolerate higher FHV loads, but that this ability becomes  
398 impaired with age and results in more rapid death. Indeed, it is increasingly recognized that  
399 sexual dimorphism in immune function exists in *Drosophila* although the precise mechanisms  
400 underlying these age-dependent dimorphic differences are poorly understood (reviewed in  
401 (BELMONTE *et al.* 2019)). More work is needed to elucidate this important aspect of immunity.

402 Both resistance and tolerance are components of host immunity (MARTINS *et al.* 2019).  
403 Antiviral RNAi is the main resistance mechanism that defends *Drosophila* against a broad  
404 range of RNA and DNA viruses, including FHV (KEMP *et al.* 2013). RNAi pathway mutants  
405 such as *Dicer-2* mutants, are more sensitive to FHV infection and mortality in *Dicer-2* mutants  
406 is accompanied by higher virus loads (GALIANA-ARNOUX *et al.* 2006). In this study, we find  
407 comparable FHV titers between young and aged flies in both whole bodies and circulating  
408 hemolymph. This suggests that aging likely affects a tolerance mechanism instead of

409 resistance mechanisms. Earlier studies demonstrated that older *Drosophila* exhibit higher  
410 mortality following infection with *E.coli*, but were able to clear bacteria at similar rates as young  
411 flies (RAMSDEN *et al.* 2008) despite age-associated decline in macrophage function (MACKENZIE  
412 *et al.* 2011; HORN *et al.* 2014). Both humoral (e.g. induction and secretion of AMPs) and  
413 cellular (e.g. phagocytosis) responses are required for bacterial clearance. The age-dependent  
414 increase in AMP expression could possibly compensate for decreased phagocyte function and  
415 account for the absence of an increase in bacterial load. Thus, the increased mortality  
416 following bacterial infection likely relies on age-dependent defects in tolerance. In our  
417 transcriptomic analysis we do not find noticeable transcriptional changes in gene expression of  
418 RNAi pathway components with aging, at least when flies are aged up to 25 days. This  
419 indirectly supports the hypothesis that antiviral RNAi is not functionally impaired in the aged fly.  
420 However, additional studies including small RNA sequencing during aging to compare the  
421 abundance of siRNAs against the FHV genome, are needed to determine whether this is the  
422 case.

423 We cannot entirely rule out the possibility that aging impacts resistance mechanisms in  
424 a tissue-specific way, differences which cannot necessarily be detected by measuring virus  
425 load in whole flies. It therefore would be very informative to perform additional studies to  
426 determine whether FHV differentially targets tissues at different ages and whether FHV load  
427 differs among tissues as a function of age. For instance, it is appreciated that aging affects  
428 gene expression differently in different tissues and in mammalian models differentially  
429 expressed genes in a given tissue are often not genes specific to this tissue (RODWELL *et al.*  
430 2004). In *Drosophila*, a temporal and spatial transcriptional study of aging done on seven  
431 different tissues identified that <10% of differentially expressed genes in each tissue were in

432 common with any other tissue (ZHAN *et al.* 2007). It is therefore possible that host factors  
433 required for virus tissue tropism at younger age (e.g. in the heart and fat body (ELEFThERIANOS  
434 *et al.* 2011)) become expressed in a different tissue in the aged host leading to shift in virus  
435 tropism accompanied by increased mortality even in the absence of higher virus titers. The  
436 aged *Drosophila*- FHV system could therefore represent an excellent model to address these  
437 questions and further examine how the aged organism is affected in the course of virus  
438 infection.

439         One striking finding of this study is that aged flies infected with FHV mount a more  
440 robust transcriptional response than younger flies. The fact that at 48h after FHV infection we  
441 find an overlap between 93% of upregulated genes and 57% of downregulated genes in young  
442 flies with genes regulated in aged flies, suggests that most of the transcriptional response to  
443 FHV is maintained as a function of age. However, aged flies show extensive regulation of  
444 additional genes. One possibility was that these additional genes are related to the process of  
445 aging itself. We show, however, that the overlap between the transcriptional profiles of aging,  
446 non-infected flies and aged, FHV-infected flies is minimal. The observed difference can  
447 potentially account for the changes in tolerance with age. Approximately three times more  
448 genes are downregulated than upregulated in aging flies in absence of viral infection. In aged,  
449 FHV-infected flies we see the opposite: a higher number of upregulated than downregulated  
450 genes for both time points examined. Thus, compared to younger adults, the aged fly mounts  
451 somehow a distinct response following FHV infection that is the consequence of the response  
452 to the virus rather than the process of aging itself. It remains unclear what factors contribute to  
453 the stronger transcriptional signature seen in aged FHV-infected flies. One hypothesis is that  
454 this possibly results from regulation by ncRNAs, including lncRNAs, which can play a role in

455 transcriptional activation (SUN AND KRAUS 2015). Indeed, we find several lncRNAs regulated by  
456 infection specifically in aged, FHV-infected flies. Future experiments could address the  
457 question of whether lncRNAs, regulate the larger transcriptional response to FHV seen in aged  
458 flies.

459 Our study finds that the gene encoding the NF- $\kappa$ B transcription factor Relish as well as  
460 additional core components of the IMD pathway such as the adaptor protein Imd and the IKK  
461 complex component Key (IKK $\gamma$ ) are upregulated following FHV infection in aged flies.  
462 Interestingly, we find several AMP and IM genes that normally are upregulated in NF- $\kappa$ B -  
463 dependent way upon bacterial and fungal infections, to be downregulated following FHV  
464 infection even in aged flies. The role of NF- $\kappa$ B pathways in *Drosophila* antiviral immunity is  
465 complex and still not fully elucidated; however the pattern of expression that we see here  
466 aligns with previous findings, where infection with the DNA virus IIV-6 leads to downregulation  
467 of AMP genes, despite intact cleavage and nuclear translocation of Relish (WEST *et al.* 2019).  
468 Repression of AMP gene expression following IIV-6 infection appears downstream of Relish  
469 and likely occurs at the level of Relish binding to the AMP gene promoter or at the level of  
470 transcriptional activation (WEST *et al.* 2019). Whether in the case of FHV infection in aged flies  
471 the strong AMP and IM gene repression is mediated by similar mechanisms will remain a focus  
472 of future research.

473 Our results indicate that aged flies strongly upregulate *dSTING* expression in response  
474 to FHV 48h p.i. In young flies, dSTING does not play a protective role against FHV, as *dSTING*  
475 null mutants show similar, if not slightly better, survival to FHV in comparison to controls (GOTO  
476 *et al.* 2018). It may be that in response to FHV, dSTING in aged flies plays a pro-death, rather  
477 than pro-survival role. In addition to its essential role in interferon production, STING signaling

478 in mammals plays a role in the activation of programmed cell death, including Caspase-9 and  
479 Caspase-3-mediated apoptosis, although the exact mechanisms are not well understood  
480 (reviewed in (MAELFAIT *et al.* 2020)). Thus, it is possible that in response to FHV, dSTING  
481 mediates the strong apoptotic signature, that could be associated with the more rapid death  
482 observed in aged flies. Future analysis of *dSTING* function in older flies in response to FHV  
483 could for instance reveal novel information about evolutionary conservation of dSTING-  
484 mediated apoptotic signaling. Additionally, because of increased apoptotic gene deregulation  
485 and the fact that phagocytic function decreases with age, future experiments should be also  
486 aimed at examining whether defective apoptotic corpse clearance is associated with the higher  
487 mortality of older flies following FHV infection.

488 Our transcriptomic analyses reveal that as FHV infection progresses in aged flies,  
489 genes associated with mitochondrial respiratory chain become downregulated. Additionally, we  
490 notice that several transcripts of genes encoded by the mitochondrial genome (Table S3) are  
491 detected in the Aged FHV samples, especially at the early, 24h time point, suggesting a link to  
492 apoptosis. One possible scenario is that p53-mediated apoptotic cell death is activated early in  
493 response to FHV leading mitochondria to become leaky and to release transcripts of genes  
494 that are encoded by the mitochondrial genome. Induction of pro-apoptotic gene expression  
495 within the first hours immediately following FHV infection of adult flies is an important  
496 mechanism that limits virus replication (LIU *et al.* 2013). It is important to examine the dynamics  
497 of this response in young and aged flies to determine whether any differences in this very early  
498 response are present between the two age groups. FHV-triggered apoptosis in the aged fly  
499 can also account for the downregulation of genes involved in the ETC and generation of ATP.  
500 As a consequence, it is possible that the bioenergetic profile of the cell is reduced and

501 mitochondrial respiration halted post-infection in aged flies. Because programmed cell death  
502 and ATP production are increasingly considered closely linked aspects of mitochondrial  
503 function (BURKE 2017), it will be important for future studies to determine whether FHV triggers  
504 apoptosis-dependent changes in cellular bioenergetics and how this relates to the more rapid  
505 death of the aged, FHV-infected organism.

506         In conclusion, in this study we addressed for the first time how aged *Drosophila* respond  
507 to infection with the plus-strand RNA virus FHV and provide a detailed transcriptional  
508 comparison of the responses between young and aged flies at two time points following  
509 infection. With the advantages that *Drosophila* offer to investigate gene function, this study  
510 sets up the stage for future investigations about the mechanisms that underlie aged host-virus  
511 interactions using not only FHV, but also other viruses. For instance, DCV triggers distinct  
512 pathophysiological events in comparison with FHV (CHTARBANOVA *et al.* 2014), and it also  
513 leads to the more rapid death of older flies (ELEFThERIANOS *et al.* 2011). It would be very  
514 interesting to explore the age-dependent response to DCV infection, as this could lead to the  
515 discovery of additional mechanisms that help the aged organism survive virus infection.

516



## 517 **Experimental procedures**

### 518 ***Drosophila* handling**

519 All *Drosophila* stocks were raised and maintained on Nutri-Fly® Bloomington formulation food  
520 (Genesee Scientific, Cat #: 66-113) at 25°C. *Oregon-R* (#2376) and *y1 w<sup>67c23</sup>* (#6599) flies  
521 were obtained from the Bloomington *Drosophila* Stock Center (Bloomington, IN). *w<sup>1118</sup>* flies  
522 were a kind gift from Dr. John Yoder (University of Alabama). For aging experiments, 0-4 days-  
523 old animals were collected, CO<sub>2</sub>-anesthetized, separated by sex and placed in a 25°C  
524 incubator with controlled 12/12 dark/light cycle. Flies were flipped every two to three days in a  
525 fresh food-containing vial until desired age was reached. For survival and virus load  
526 determination young flies were 3-7-day old (labeled as 5d-old), and aged flies were 27-31-day  
527 old (labeled as 30d-old). For RNA-Seq experiments, replicates containing young flies were 6-9  
528 days-old (labeled as 7d-old), and aged flies were 22-29 days-old (labeled as 25d-old), Table  
529 S6. *Wolbachia*-free flies were used in all experiments.

530

### 531 **Virus stock and infections**

532 Flock House Virus (FHV) was a kind gift from Dr. Annette Schneemann (Scripps Research  
533 Institute, La Jolla, CA). FHV stock titer was determined at 2.92E+06 TCID<sub>50</sub>/mL (Figure S9)  
534 using the method as in (ELEFThERIANOS *et al.* 2011). Flies of desired sex, age and genotype  
535 were individually injected with 4.6nL of either virus stock solution or control 10mM Tris-HCl  
536 pH7.5 solution under CO<sub>2</sub> anesthesia using a Nanoject II injector (Drummond Scientific). Flies  
537 were let to recover from the injection for ~one hour at room temperature and then were placed  
538 in a 22°C incubator. For survival experiments, flies were separated by sex and placed in  
539 groups of 10 per vial for each experimental treatment. The number of living flies was recorded

540 every 24 h. For virus load determination by RT-qPCR, flies were separated by sex and frozen  
541 in groups of 5 flies per experimental treatment prior RNA extraction.

542

### 543 **RNA sequencing**

544 The Quick-RNA MiniPrep Kit (Zymo Research) was used to isolate total RNA from fifteen  
545 whole flies. Three biological replicates were collected for each experimental condition. RNA  
546 was extracted following manufacturer's instructions and sent to Novogene Co., Ltd. for RNA  
547 sequencing. Prior directional library preparation, quality of RNA for all samples was evaluated  
548 by Novogene Co., Ltd. for purity, degradation, potential contamination and integrity. Only for  
549 samples that passed quality control mRNA was enriched using oligo(dT) beads. Constructed  
550 libraries were quality checked and paired end sequencing performed using Illumina  
551 technology. Initial bioinformatics analysis to determine differential gene expression was  
552 performed by Novogene Co., Ltd using the *Drosophila melanogaster* reference genome  
553 (dmel\_r6.23\_FB2018\_04). Readcounts were normalized using the DESeq 1.10.1 (ANDERS AND  
554 HUBER 2010) method and adjusted *p*-values (*p adj*) estimated based on a negative binomial  
555 distribution model. *p adj* < 0.05 were considered significant. Validation of gene expression by  
556 RT-qPCR was performed on RNA used for the RNAseq experiment. Determination of  
557 differential gene expression in experimental groups is as follows: Aging: Non-infected  
558 25d/Non-infected 7d; Young FHV24h: 7d FHV 24h/7d Tris 24h; Aged FHV24h: 25d FHV  
559 24h/25d Tris 24h. Young FHV48h: 7d FHV 48h/7d Tris 48h; Aged FHV48h: 25d FHV 48h/25d  
560 Tris 48h.

561

### 562 **RT-qPCR gene expression analysis**

563 The Quick-RNA MiniPrep Kit (Zymo Research) was used to isolate total RNA following  
564 manufacturer's instructions. RNA (1000ng) was converted to cDNA using the High Capacity  
565 RNA-to-cDNA Kit (Applied Biosystems). RT-qPCR reaction was performed using  
566 *Power SYBR™ Green PCR Master Mix* (Applied Biosystems) according to manufacturer's  
567 instructions. Primer sequences are listed in Table S7. For all assays, expression of *RpL32*  
568 (*Rp49*) was used to normalize gene expression.

569

### 570 **Statistical analysis**

571 Statistical analysis of median survival, virus load and gene expression analysis were  
572 performed using GraphPad Prism 8 for MAC software and  $p < 0.05$  considered significant.

573

### 574 **Functional annotation analysis**

575 We used the Database for Annotation, Visualization and Integrated Discovery (DAVID) 6.8  
576 (HUANG *et al.* 2009b; HUANG *et al.* 2009a) to analyze enriched functional gene categories,  
577 including gene ontology (GO) and KEGG pathways for differentially regulated genes at least  
578 two-fold. The cut-off  $p$  value to determine enriched GO categories and pathways was set at  
579 0.1.

580

### 581 **Data availability**

582 Raw sequencing reads generated during this project have been deposited with the National  
583 Center for Biotechnology Information Sequence Read Archive under BioProject  
584 PRJNA644593. File names corresponding to experimental samples are shown in Table S7.  
585 The authors affirm that all data necessary for confirming the conclusions of the article are

586 present within the article, figures, and tables, and in supplemental material. Supplemental files  
587 including supplemental experimental procedures, figures and tables have been deposited to  
588 the GSA Figshare portal. Supplemental tables S3 and S5 have been submitted as Excel files  
589 while all other supplemental materials are in a PDF format.

590

591 **Acknowledgements**

592 We thank Dr. Annette Schneemann for FHV virus stock and the anti-FHV antibody used in this  
593 study. We are grateful to Drs. David Wassarman and Grace Boekhoff-Falk for critical reading  
594 of the manuscript. The Authors declare that they have no conflict of interest.

595

596 **Author contributions**

597 SC conceptualized the study and designed experiments; LS, NMS, AE, EH, MD and CG  
598 performed experiments and data collection; SC, LS, NMS, AE, EH, CG and MD analyzed data,  
599 JLF analyzed RNA-Seq data; SC and JLF wrote the manuscript with input from all authors. All  
600 authors read and approved the manuscript.

601

602

603 **Figure legends**

604 **Figure 1. FHV infection triggers more rapid death of aged *Drosophila* without**

605 **accumulation of higher virus load. A.** Survival curves of young and aged male and female

606 *OregonR Drosophila* that have been infected with FHV or control-injected with the same

607 volume of Tris. Statistics of median survival to FHV are based on a Student's *t*-test. \*\*\*\*:

608  $p < 0.0001$ , \*:  $p < 0.05$ . **B.** Virus load determined by *FHV RNA1* expression reveals comparable

609 titers between young and aged animals. Note that significant difference is observed between

610 males and females in both young and aged flies. Statistics are based on two-way ANOVA

611 followed by Tukey post-test to correct for multiple comparisons. \*\*\*\*:  $p < 0.0001$ , \*\*:  $p < 0.001$ , \*:

612  $p < 0.05$ , ns=non-significant.

613

614 **Figure 2. FHV infection of aged flies leads to a robust transcriptional response. A.**

615 Principal component analysis for all experimental samples. **B.** Comparison of the number of

616 differentially regulated genes at least two-fold in all conditions. Positive values represent

617 upregulated genes and negative values represent downregulated genes. **C.** Venn diagrams

618 showing overlaps between differentially regulated genes for selected experimental conditions.

619

620 **Figure 3. Common and distinct biological processes are regulated by aging and FHV**

621 **infection in *Drosophila*.** Venn diagram showing overlaps between Biological processes

622 among different experimental groups, based on Gene ontology analysis.

623

624 **Figure 4. Regulation of innate immunity and programmed cell death genes by aging and**

625 **FHV infection. A.** Heatmap comparing the expression of genes belonging to the GO category

626 'innate immune response' based on their expression in all experimental groups. **B.** Heatmap  
627 comparing the expression of genes belonging to the GO category 'apoptotic process' based on  
628 their expression in all experimental groups.

629

630 **Figure 5. Gene ontology analysis for cellular component of genes specifically**  
631 **downregulated in aged, FHV-infected flies, reveal enrichment for mitochondria and**  
632 **mitochondrial respiratory chain complexes.** GO analysis of at least two-fold differentially  
633 regulated genes 48h post FHV infection in aged flies. All identified categories are shown.

634

635 **Figure 6. ncRNAs are differentially regulated by aging and infection. A.** Comparison of  
636 the number of differentially regulated genes encoding for ncRNAs at least two-fold in all  
637 conditions. Positive values represent upregulated genes and negative values represent  
638 downregulated genes. **B.** Venn diagrams showing overlaps between differentially regulated  
639 ncRNA genes for selected experimental conditions. **C.** RT-qPCR-based gene expression  
640 analysis of asRNA *CR45445* and lncRNA *CR46083* 48h p.i. Statistics are based on two-way  
641 ANOVA followed by Tukey post-test to correct for multiple comparisons. \*\*\*\*:  $p < 0.0001$ , \*\* :  
642  $p < 0.001$ , \*:  $p < 0.05$ , ns=non-significant.

## 643 References

- 644 Anders, S., and W. Huber, 2010 Differential expression analysis for sequence count data. *Genome*  
645 *Biol* 11: R106.
- 646 Belmonte, R. L., M. K. Corbally, D. F. Duneau and J. C. Regan, 2019 Sexual Dimorphisms in Innate  
647 Immunity and Responses to Infection in *Drosophila melanogaster*. *Front Immunol* 10:  
648 3075.
- 649 Boyle, M., C. Wong, M. Rocha and D. L. Jones, 2007 Decline in self-renewal factors contributes to  
650 aging of the stem cell niche in the *Drosophila* testis. *Cell Stem Cell* 1: 470-478.
- 651 Burke, P. J., 2017 Mitochondria, Bioenergetics and Apoptosis in Cancer. *Trends Cancer* 3: 857-870.
- 652 Cao, Y., S. Chtarbanova, A. J. Petersen and B. Ganetzky, 2013 Dnr1 mutations cause  
653 neurodegeneration in *Drosophila* by activating the innate immune response in the brain.  
654 *Proc Natl Acad Sci U S A* 110: E1752-1760.
- 655 Carney, T. D., A. J. Struck and C. Q. Doe, 2013 midlife crisis encodes a conserved zinc-finger protein  
656 required to maintain neuronal differentiation in *Drosophila*. *Development* 140: 4155-4164.
- 657 Chtarbanova, S., O. Lamiable, K. Z. Lee, D. Galiana, L. Troxler *et al.*, 2014 *Drosophila* C virus  
658 systemic infection leads to intestinal obstruction. *J Virol* 88: 14057-14069.
- 659 Eleftherianos, I., S. Won, S. Chtarbanova, B. Squiban, K. Ocorr *et al.*, 2011 ATP-sensitive potassium  
660 channel (K(ATP))-dependent regulation of cardiotropic viral infections. *Proc Natl Acad Sci*  
661 *U S A* 108: 12024-12029.
- 662 Fabian, D. K., K. Garschall, P. Klepsatel, G. Santos-Matos, E. Sucena *et al.*, 2018 Evolution of  
663 longevity improves immunity in *Drosophila*. *Evol Lett* 2: 567-579.
- 664 Franceschi, C., M. Bonafe, S. Valensin, F. Olivieri, M. De Luca *et al.*, 2000 Inflamm-aging. An  
665 evolutionary perspective on immunosenescence. *Ann N Y Acad Sci* 908: 244-254.
- 666 Galiana-Arnoux, D., C. Dostert, A. Schneemann, J. A. Hoffmann and J. L. Imler, 2006 Essential  
667 function in vivo for Dicer-2 in host defense against RNA viruses in *drosophila*. *Nat Immunol*  
668 7: 590-597.
- 669 Garschall, K., and T. Flatt, 2018 The interplay between immunity and aging in *Drosophila*.  
670 *F1000Res* 7: 160.
- 671 Goto, A., K. Okado, N. Martins, H. Cai, V. Barbier *et al.*, 2018 The Kinase IKKbeta Regulates a STING-  
672 and NF-kappaB-Dependent Antiviral Response Pathway in *Drosophila*. *Immunity* 49: 225-  
673 234 e224.
- 674 He, W., D. Goodkind and P. Kowal, 2016 An Aging World: 2015., pp. in *U.S. Census Bureau,*  
675 *International Population Reports*.
- 676 Horn, L., J. Leips and M. Starz-Gaiano, 2014 Phagocytic ability declines with age in adult *Drosophila*  
677 hemocytes. *Aging Cell* 13: 719-728.
- 678 Huang, D. W., B. T. Sherman and R. A. Lempicki, 2009a Bioinformatics enrichment tools: paths  
679 toward the comprehensive functional analysis of large gene lists. *Nucleic Acids Research*  
680 37: 1-13.
- 681 Huang, D. W., B. T. Sherman and R. A. Lempicki, 2009b Systematic and integrative analysis of large  
682 gene lists using DAVID bioinformatics resources. *Nature Protocols* 4: 44-57.
- 683 Kemp, C., S. Mueller, A. Goto, V. Barbier, S. Paro *et al.*, 2013 Broad RNA interference-mediated  
684 antiviral immunity and virus-specific inducible responses in *Drosophila*. *J Immunol* 190:  
685 650-658.



- 686 Kounatidis, I., S. Chtarbanova, Y. Cao, M. Hayne, D. Jayanth *et al.*, 2017 NF-kappaB Immunity in the  
687 Brain Determines Fly Lifespan in Healthy Aging and Age-Related Neurodegeneration. *Cell*  
688 *Rep* 19: 836-848.
- 689 Lamiable, O., and J. L. Imler, 2014 Induced antiviral innate immunity in *Drosophila*. *Curr Opin*  
690 *Microbiol* 20: 62-68.
- 691 Lemaitre, B., and J. Hoffmann, 2007 The host defense of *Drosophila melanogaster*. *Annu Rev*  
692 *Immunol* 25: 697-743.
- 693 Leng, J., and D. R. Goldstein, 2010 Impact of aging on viral infections. *Microbes Infect* 12: 1120-  
694 1124.
- 695 Liu, B., S. K. Behura, R. J. Clem, A. Schneemann, J. Becnel *et al.*, 2013 P53-mediated rapid induction  
696 of apoptosis conveys resistance to viral infection in *Drosophila melanogaster*. *PLoS Pathog*  
697 9: e1003137.
- 698 Liu, Y., B. Gordesky-Gold, M. Leney-Greene, N. L. Weinbren, M. Tudor *et al.*, 2018 Inflammation-  
699 Induced, STING-Dependent Autophagy Restricts Zika Virus Infection in the *Drosophila*  
700 Brain. *Cell Host Microbe* 24: 57-68 e53.
- 701 Mackenzie, D. K., L. F. Bussiere and M. C. Tinsley, 2011 Senescence of the cellular immune response  
702 in *Drosophila melanogaster*. *Exp Gerontol* 46: 853-859.
- 703 Maelfait, J., L. Liverpool and J. Rehwinkel, 2020 Nucleic Acid Sensors and Programmed Cell Death. *J*  
704 *Mol Biol* 432: 552-568.
- 705 Martins, R., A. R. Carlos, F. Braza, J. A. Thompson, P. Bastos-Amador *et al.*, 2019 Disease Tolerance  
706 as an Inherent Component of Immunity. *Annual Review of Immunology*, Vol 37, 2019 37:  
707 405-437.
- 708 Merklings, S. H., G. J. Overheul, J. T. van Mierlo, D. Arends, C. Gilissen *et al.*, 2015 The heat shock  
709 response restricts virus infection in *Drosophila*. *Sci Rep* 5: 12758.
- 710 Mussabekova, A., L. Daeffler and J. L. Imler, 2017 Innate and intrinsic antiviral immunity in  
711 *Drosophila*. *Cell Mol Life Sci* 74: 2039-2054.
- 712 Nikolich-Zugich, J., 2018 The twilight of immunity: emerging concepts in aging of the immune  
713 system. *Nat Immunol* 19: 10-19.
- 714 Nikolich-Zugich, J., K. S. Knox, C. T. Rios, B. Natt, D. Bhattacharya *et al.*, 2020 SARS-CoV-2 and  
715 COVID-19 in older adults: what we may expect regarding pathogenesis, immune responses,  
716 and outcomes (vol 42, pg 505, 2020). *Geroscience* 42: 1013-1013.
- 717 Pletcher, S. D., S. J. Macdonald, R. Marguerie, U. Certa, S. C. Stearns *et al.*, 2002 Genome-wide  
718 transcript profiles in aging and calorically restricted *Drosophila melanogaster*. *Curr Biol*  
719 12: 712-723.
- 720 Ramsden, S., Y. Y. Cheung and L. Seroude, 2008 Functional analysis of the *Drosophila* immune  
721 response during aging. *Aging Cell* 7: 225-236.
- 722 Rodwell, G. E., R. Sonu, J. M. Zahn, J. Lund, J. Wilhelmy *et al.*, 2004 A transcriptional profile of aging  
723 in the human kidney. *PLoS Biol* 2: e427.
- 724 Settles, E. W., and P. D. Friesen, 2008 Flock house virus induces apoptosis by depletion of  
725 *Drosophila* inhibitor-of-apoptosis protein DIAP1. *J Virol* 82: 1378-1388.
- 726 Shah, P. S., N. Link, G. M. Jang, P. P. Sharp, T. Zhu *et al.*, 2018 Comparative Flavivirus-Host Protein  
727 Interaction Mapping Reveals Mechanisms of Dengue and Zika Virus Pathogenesis. *Cell* 175:  
728 1931-1945 e1918.
- 729 Sun, M., and W. L. Kraus, 2015 From discovery to function: the expanding roles of long noncoding  
730 RNAs in physiology and disease. *Endocr Rev* 36: 25-64.

- 731 Tatar, M., 2010 Reproductive aging in invertebrate genetic models. *Ann N Y Acad Sci* 1204: 149-  
732 155.
- 733 Venter, P. A., and A. Schneemann, 2008 Recent insights into the biology and biomedical  
734 applications of Flock House virus. *Cell Mol Life Sci* 65: 2675-2687.
- 735 West, C., F. Rus, Y. Chen, A. Kleino, M. Gangloff *et al.*, 2019 IIV-6 Inhibits NF-kappaB Responses in  
736 *Drosophila*. *Viruses* 11.
- 737 Zerofsky, M., E. Harel, N. Silverman and M. Tatar, 2005 Aging of the innate immune response in  
738 *Drosophila melanogaster*. *Aging Cell* 4: 103-108.
- 739 Zhan, M., H. Yamaza, Y. Sun, J. Sinclair, H. Li *et al.*, 2007 Temporal and spatial transcriptional  
740 profiles of aging in *Drosophila melanogaster*. *Genome Res* 17: 1236-1243.  
741

## Figure 1

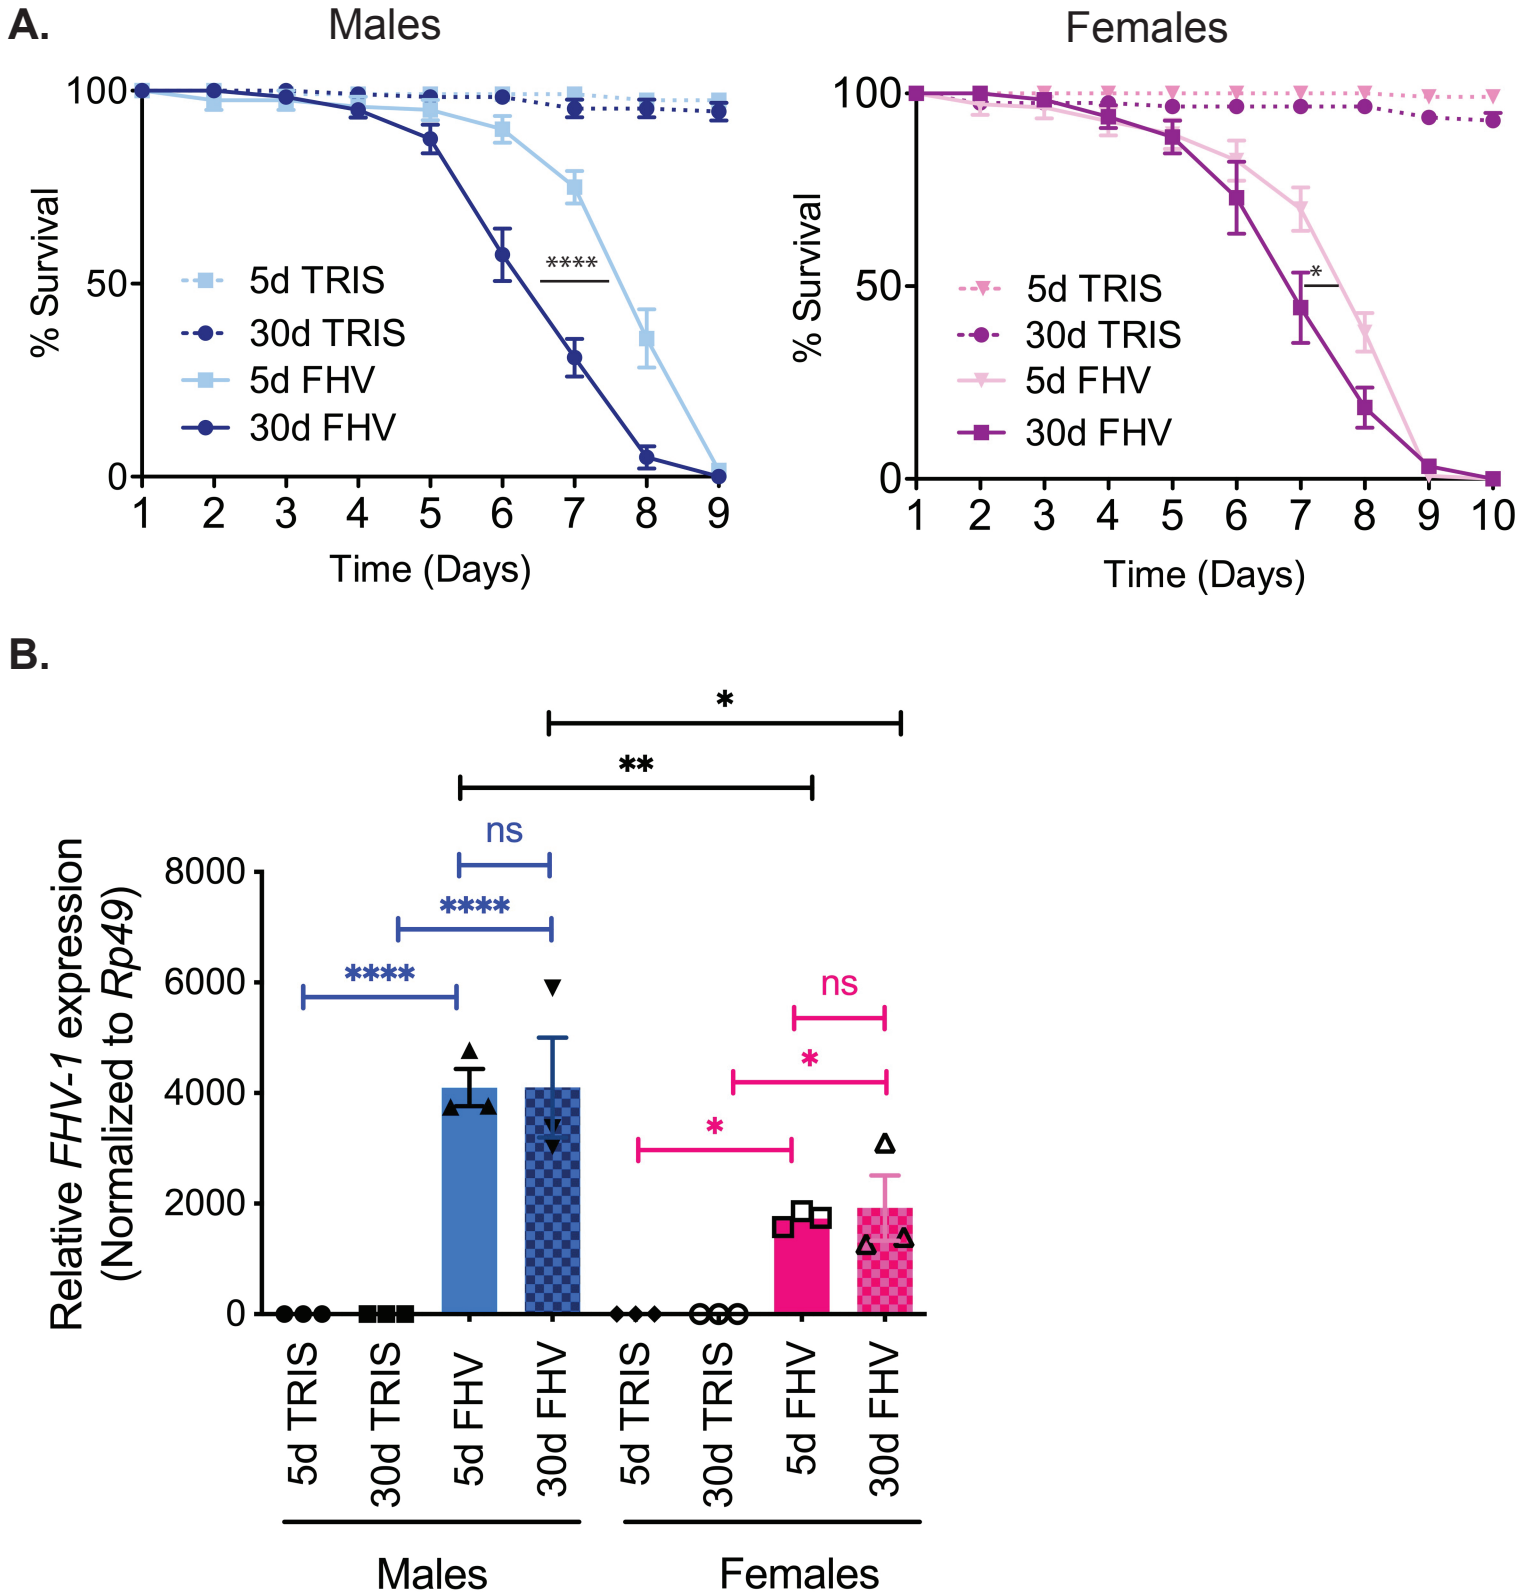

## Figure 2

**A.**

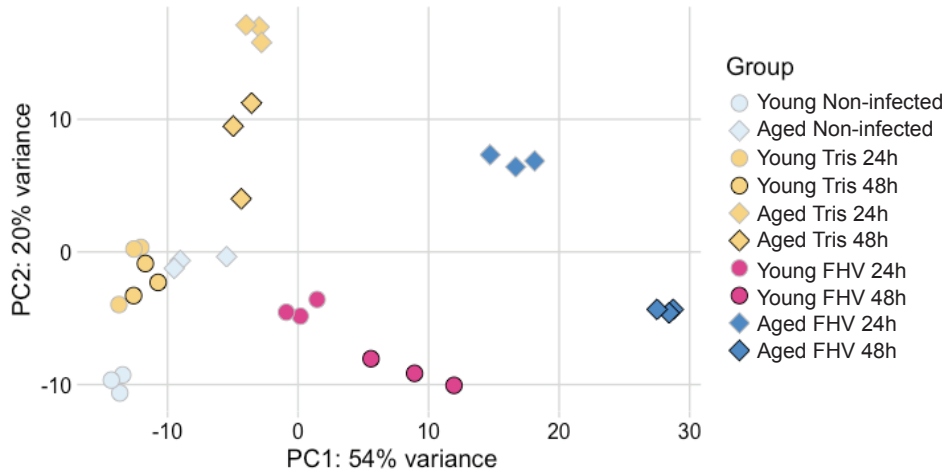

**B.**

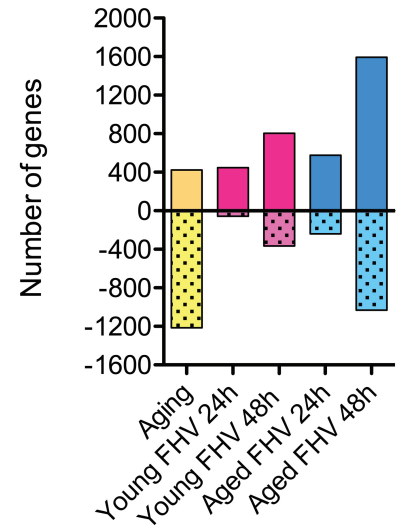

**C.**

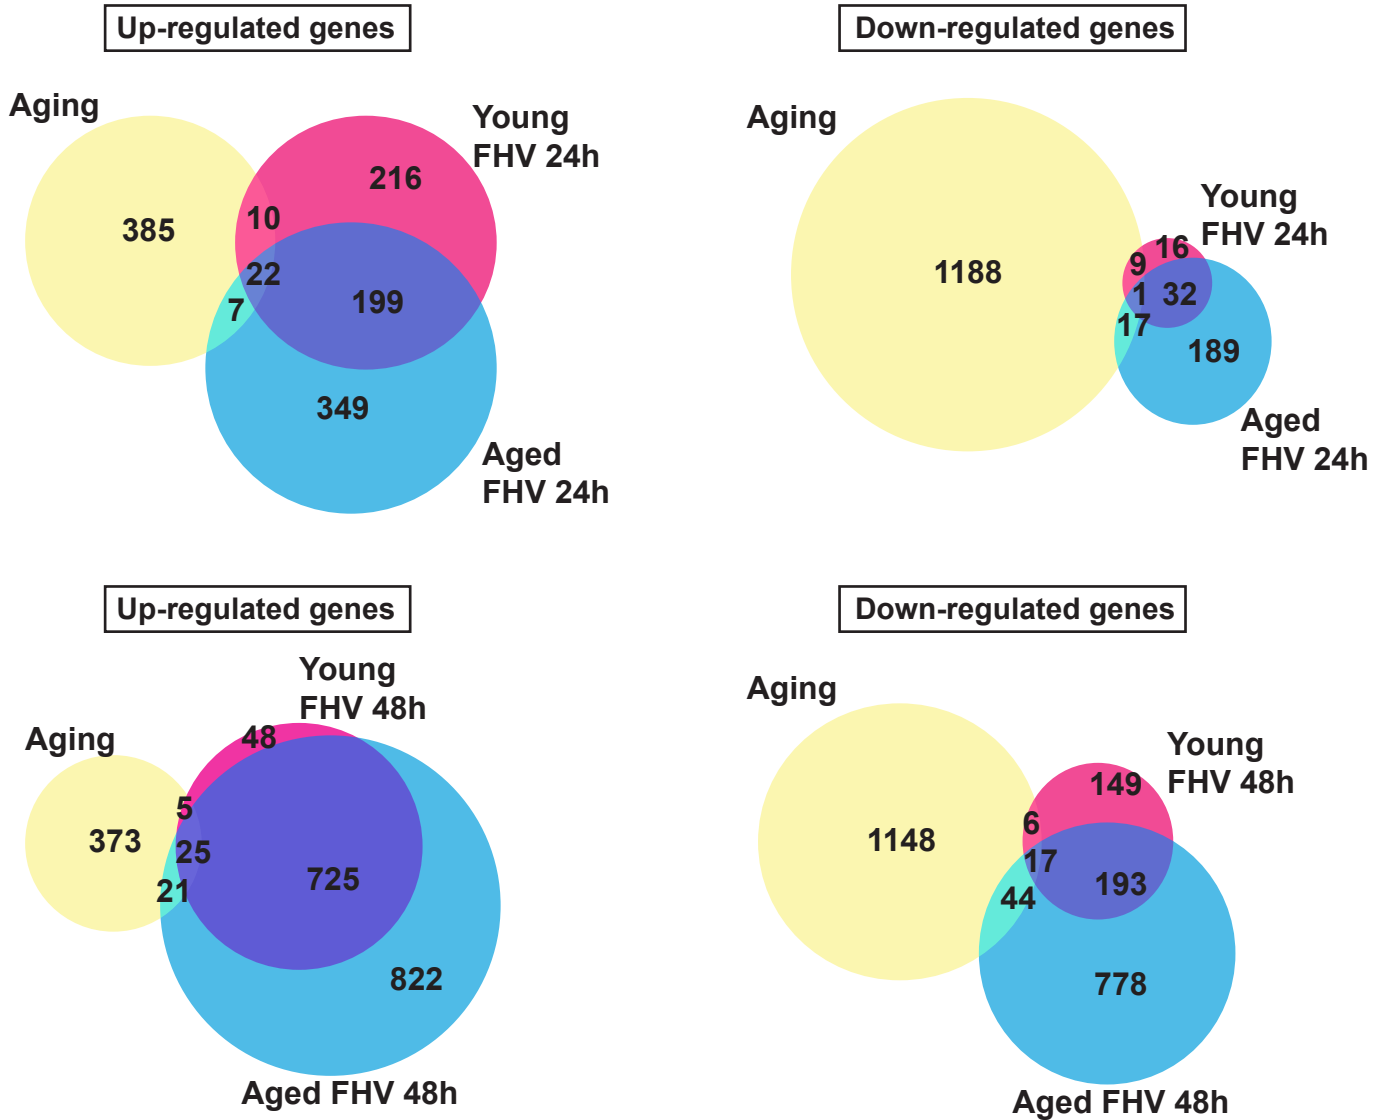

### Figure 3

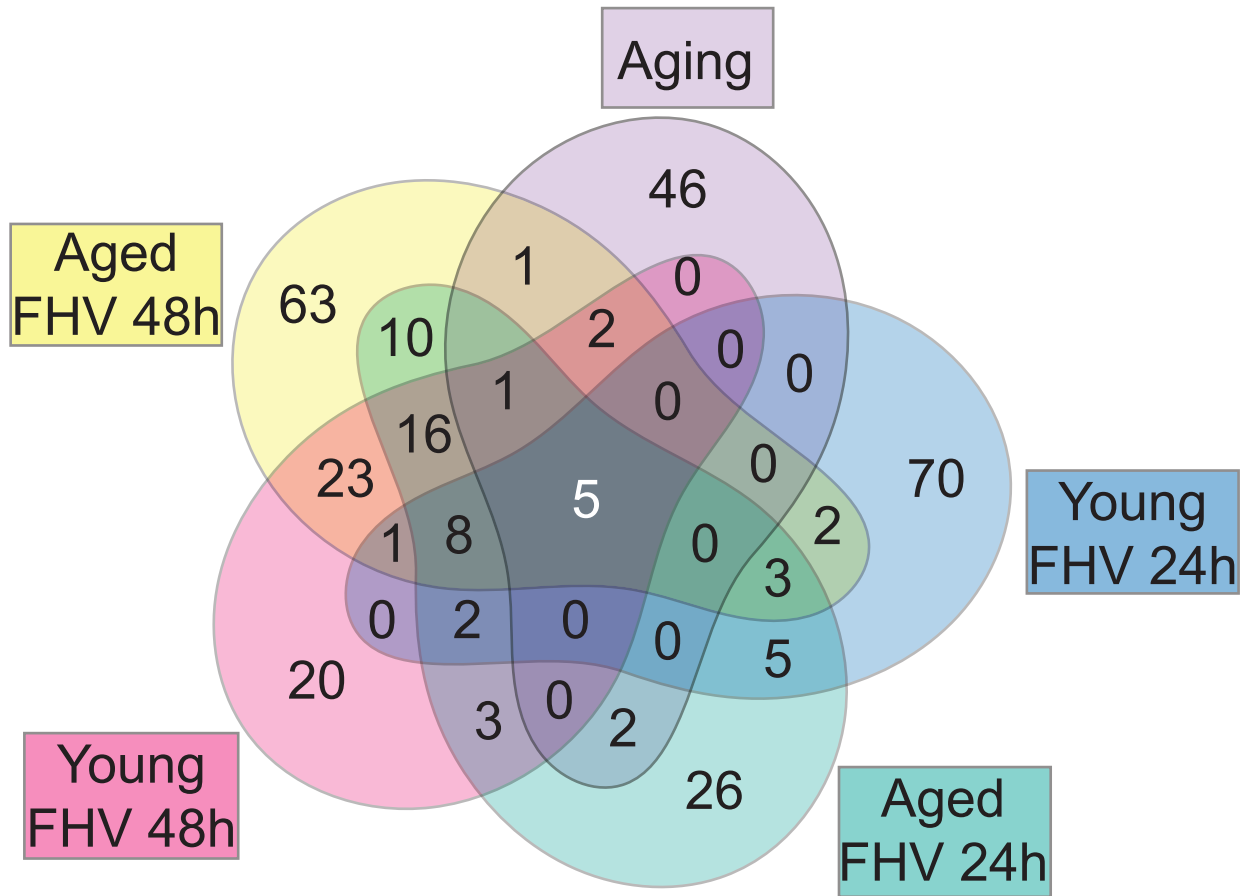

## Figure 4

### A. GO 0045087 ~ Innate immune response

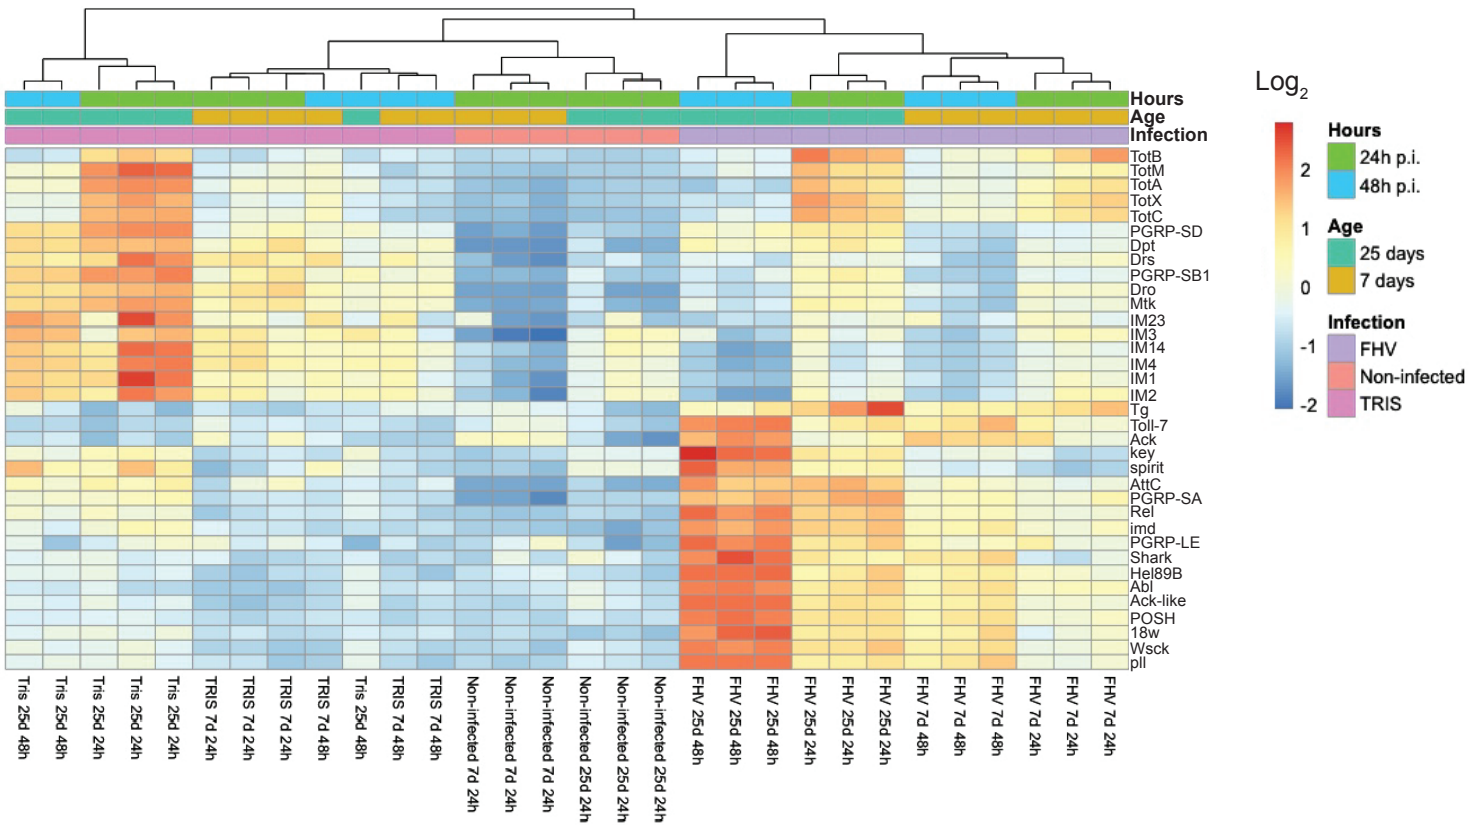

### B. GO 0006915 ~ Apoptotic process

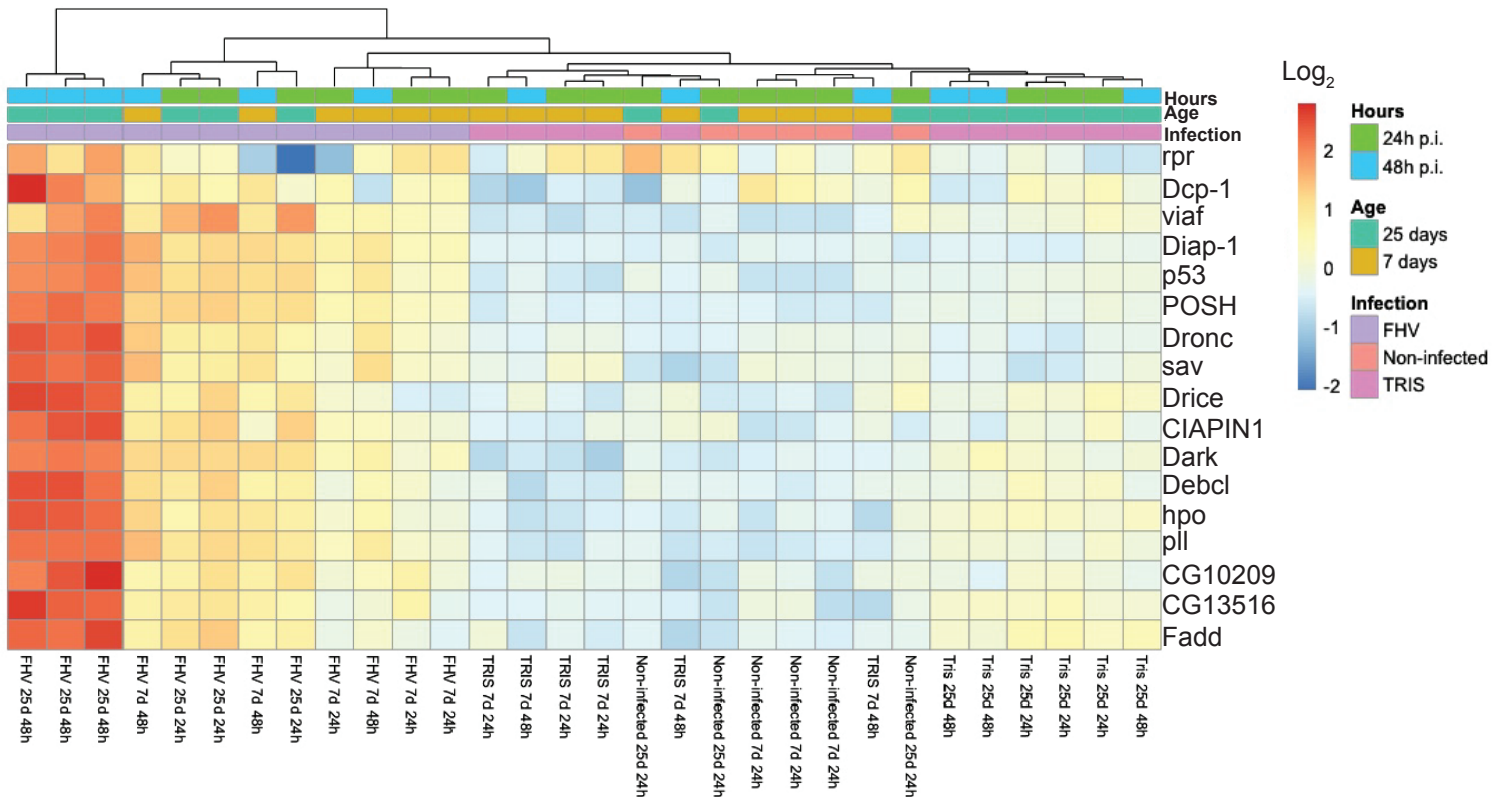

## Figure 5

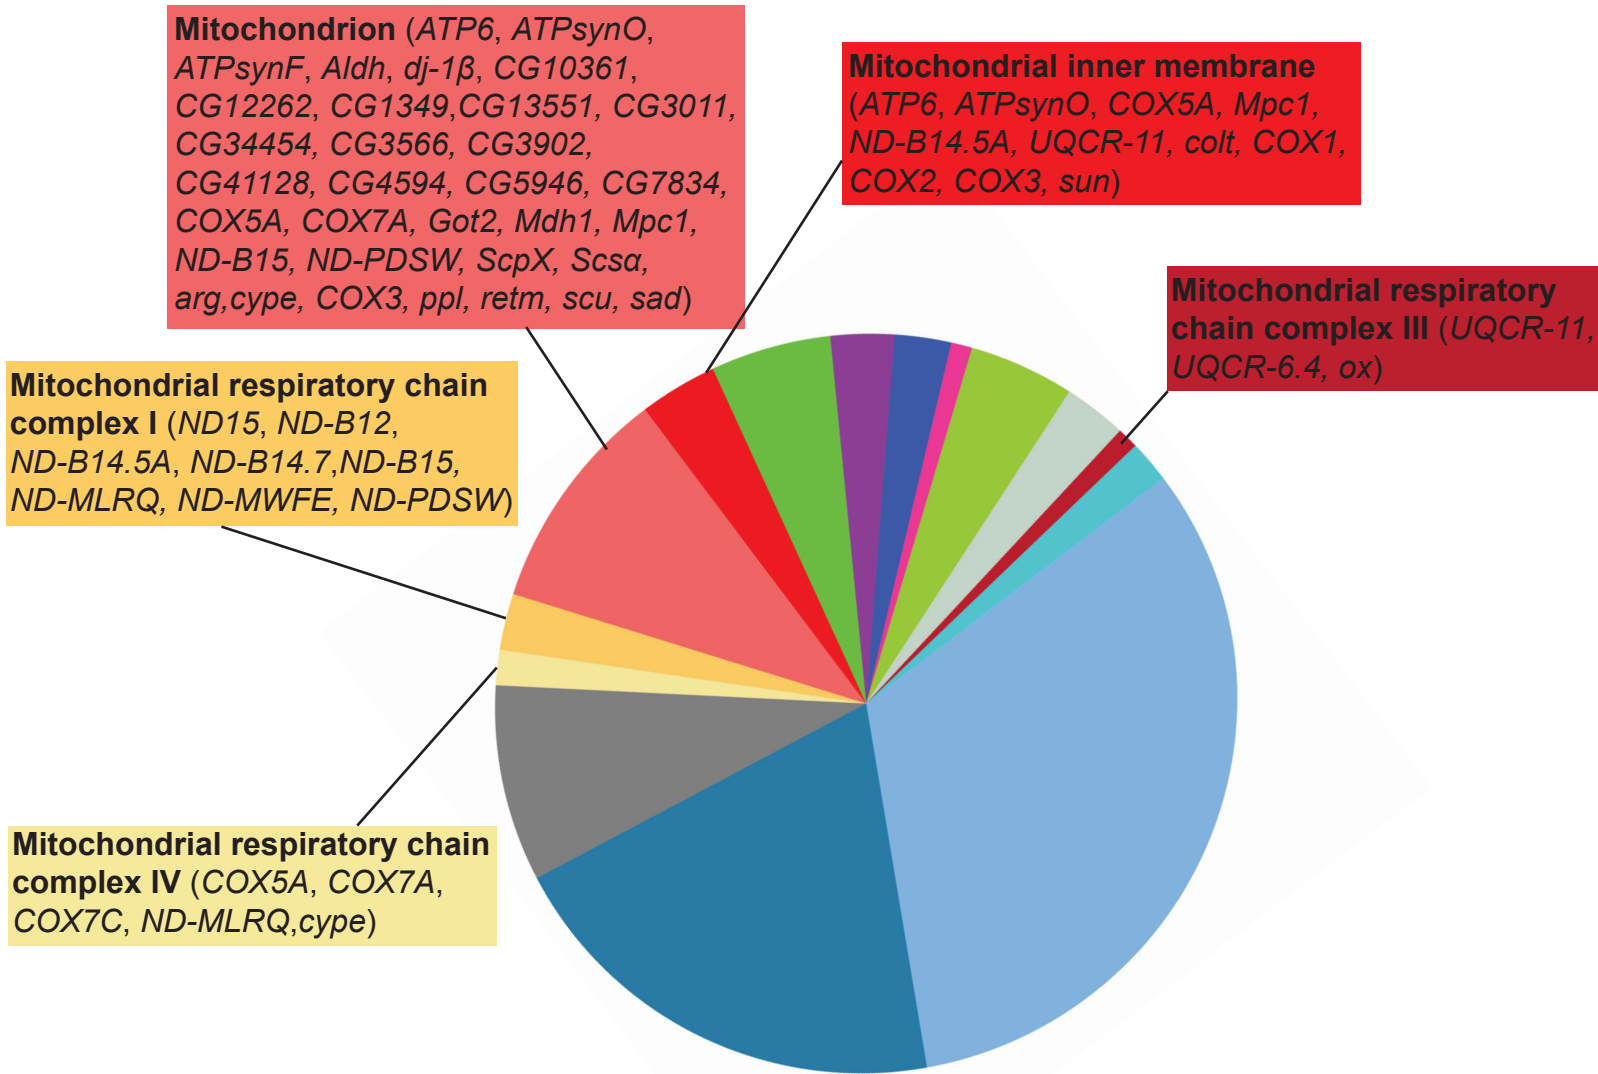

Total number of genes: 325

- GO:0005615~extracellular space
- GO:0005576~extracellular region
- GO:0005811~lipid particle
- GO:0005751~mitochondrial respiratory chain complex IV
- GO:0005747~mitochondrial respiratory chain complex I
- GO:0005739~mitochondrion
- GO:0005743~mitochondrial inner membrane
- GO:0005783~endoplasmic reticulum
- GO:0005777~peroxisome
- GO:0031090~organelle membrane
- GO:0031430~M band
- GO:0012505~endomembrane system
- GO:0005840~ribosome
- GO:0005750~mitochondrial respiratory chain complex III
- GO:0022625~cytosolic large ribosomal subunit

## Figure 6

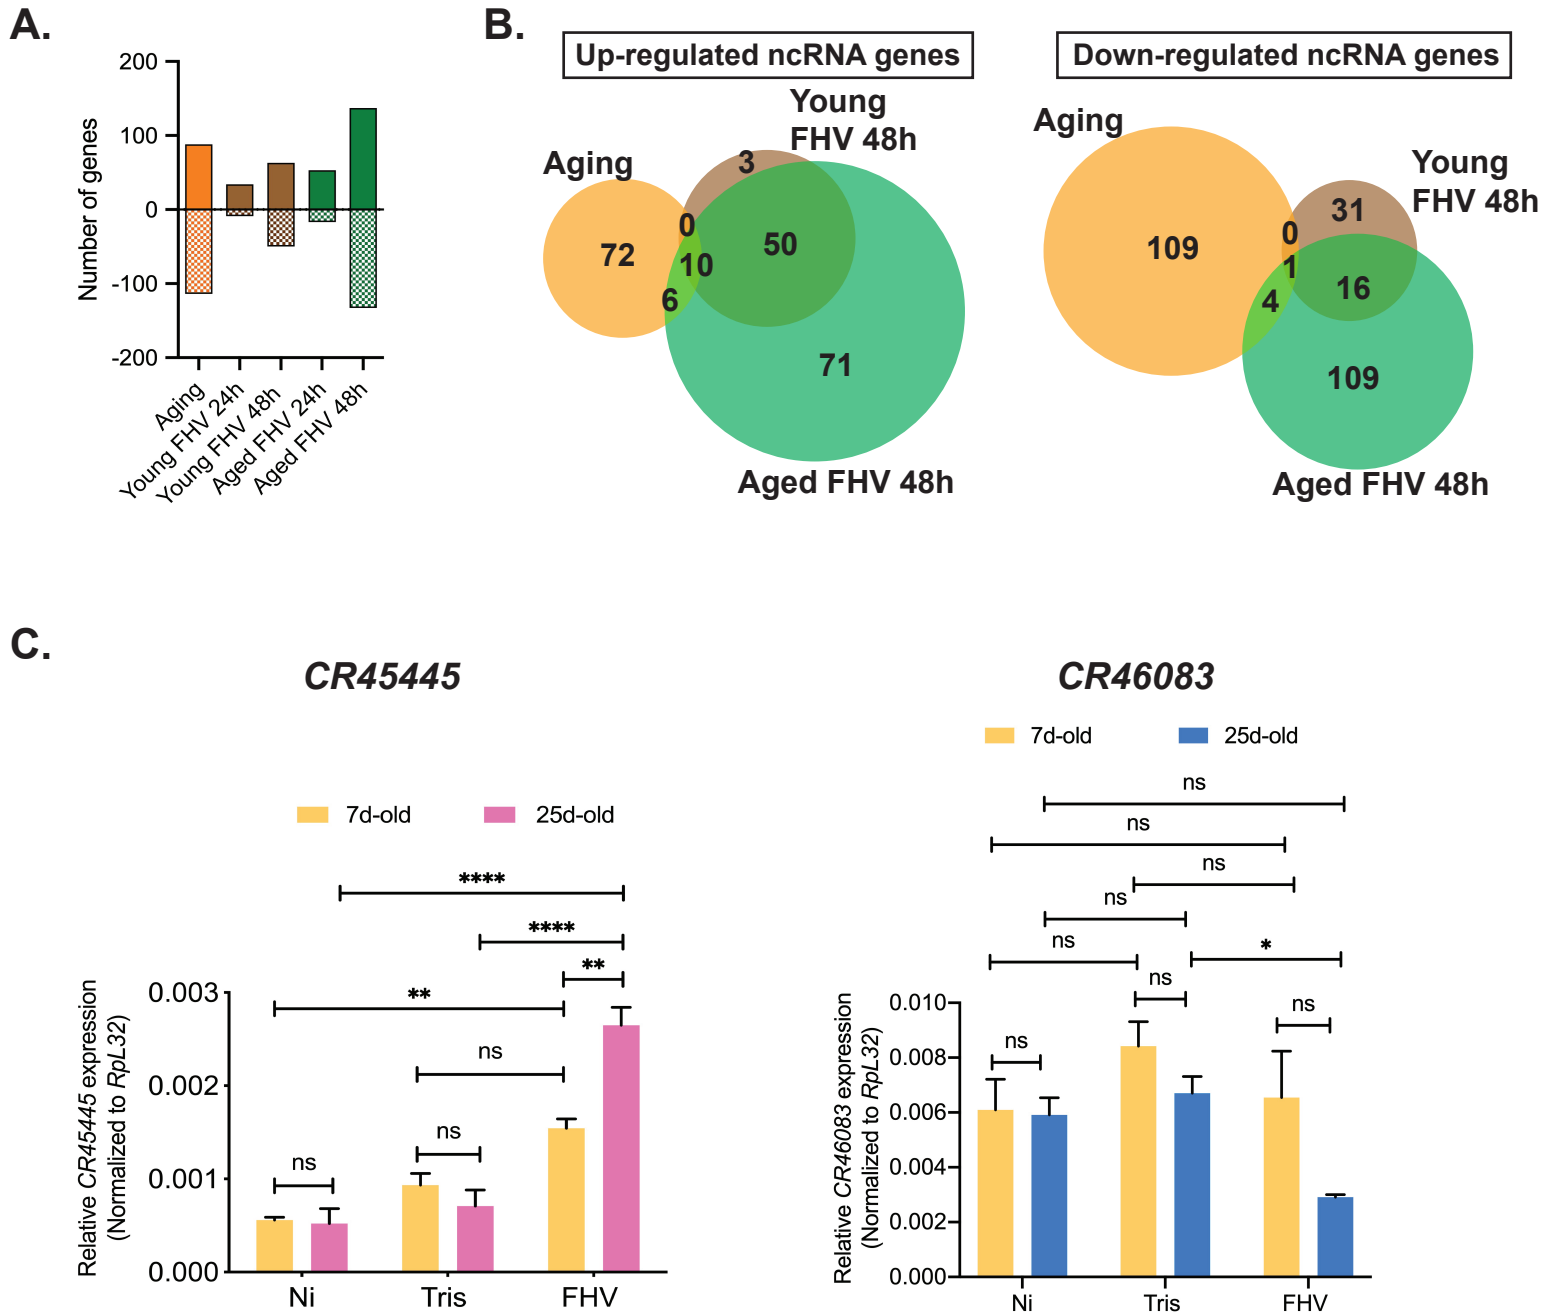

Source: https://www.biorxiv.org/content/10.1101/2020.09.21.307017v1.full.pdf
